# Supplementary material
Source: MDPI journal article supplement (https://www.mdpi.com/2079-9284/8/4/119)

# The Protective Effect of *Hamamelis virginiana* Stem and Leaf Extract on Fine Dust-Induced Damage on Human Keratinocytes

Jiyoung Choi <sup>1</sup>, Dongki Yang <sup>2</sup>, Mi Yeon Moon <sup>1</sup>, Gi Yeon Han <sup>1</sup>, Moon Sik Chang <sup>1</sup> and Joonseok Cha <sup>1,\*</sup>

<sup>1</sup> Research Center, The Garden of Natural Solution, Osan-si, Gyeonggi-do 18103, Korea; jychoi@naturalsolution.co.kr (J.C.); mares1982@naturalsolution.co.kr (M.Y.M.); elin\_han@naturalsolution.co.kr (G.Y.H.); justin0510@naturalsolution.co.kr (M.S.C.)

<sup>2</sup> Department of Physiology, College of Medicine, Gachon University, Incheon 21999, Korea; dkyang@gachon.ac.kr

\* Correspondence: jcha1@naturalsolution.co.kr

## Supplementary material

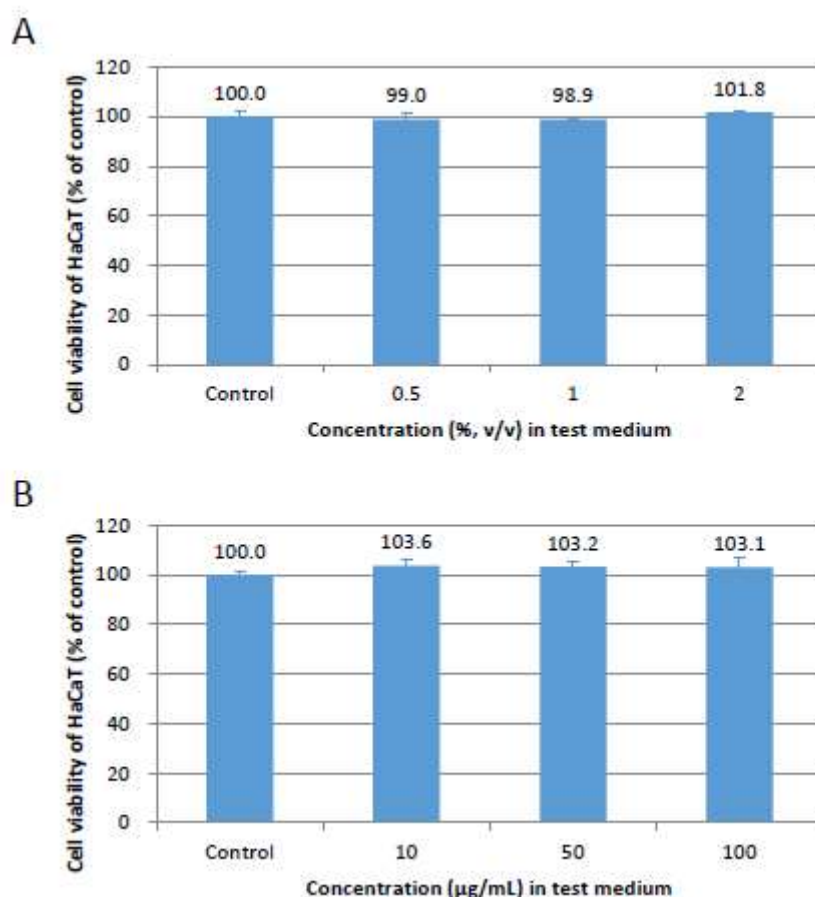

**Figure S1.** Cytotoxicity of HVE and HGG. HVE and its active compound HGG did not show significant cytotoxicity at the concentrations used in the current study.

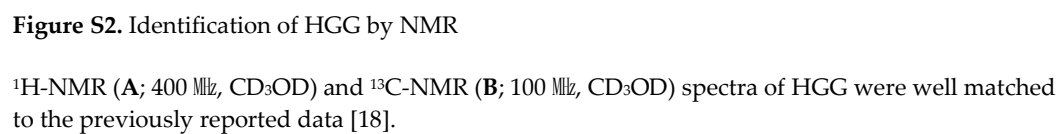

Supplement: s1 [file s1]
